# Supplementary material for: Simultaneous determination of two galangin metabolites from Alpinia Officinarum Hance in rat plasma by UF LC-MS/MS and its application in pharmacokinetics study
Source: PeerJ. 2021 Mar 16;9:e11041. doi: 10.7717/peerj.11041 (PMC7977375; doi:10.7717/peerj.11041)
Supplement: Supplemental Information 1 — All measured values in method validation. [file peerj-09-11041-s001.xlsx]

## Sheet: galangin-7-o-Glu
	Sample Name	Analyte Peak Area (counts)	Analyte Concentration (ng/mL)	IS Peak Area (counts)	Use Record	Record Modified	Calculated Concentration (ng/mL)	Accuracy (%)
1	DPHA_B_C-gal-galG-K-plasma-Methol-std1-01	3890	2	264000	1	1	1.87	93.6
2	DPHA_B_C-gal-galG-K-plasma-Methol-std1-02	6420	2	445000	1	1	1.8	89.9
3	DPHA_B_C-gal-galG-K-plasma-Methol-std1-03	6940	2	491000	1	0	1.73	86.7
4	DPHA_B_C-gal-galG-K-plasma-Methol-std1-04	4510	2	312000	1	1	1.81	90.6
5	DPHA_B_C-gal-galG-K-plasma-Methol-std2-01	7300	5	259000	1	1	4.81	96.2
6	DPHA_B_C-gal-galG-K-plasma-Methol-std2-02	14500	5	518000	1	0	4.8	96
7	DPHA_B_C-gal-galG-K-plasma-Methol-std2-03	14600	5	496000	1	1	5.09	102
8	DPHA_B_C-gal-galG-K-plasma-Methol-std2-04	16300	5	522000	1	0	5.49	110
9	DPHA_B_C-gal-galG-K-plasma-Methol-std3-01	26600	10	514000	1	0	10	100
10	DPHA_B_C-gal-galG-K-plasma-Methol-std3-02	30100	10	538000	1	0	10.9	109
11	DPHA_B_C-gal-galG-K-plasma-Methol-std3-03	27600	10	513000	1	0	10.5	105
12	DPHA_B_C-gal-galG-K-plasma-Methol-std3-04	11700	10	248000	1	1	9.01	90.1
13	DPHA_B_C-gal-galG-K-plasma-Methol-std4-01	41900	20	400000	1	1	21.6	108
14	DPHA_B_C-gal-galG-K-plasma-Methol-std4-02	21300	20	220000	1	1	19.9	99.3
15	DPHA_B_C-gal-galG-K-plasma-Methol-std4-03	20600	20	222000	1	1	19	95.2
16	DPHA_B_C-gal-galG-K-plasma-Methol-std4-04	31100	20	290000	1	1	22.2	111
17	DPHA_B_C-gal-galG-K-plasma-Methol-std5-01	242000	100	494000	1	0	106	106
18	DPHA_B_C-gal-galG-K-plasma-Methol-std5-02	229000	100	532000	1	0	93.2	93.2
19	DPHA_B_C-gal-galG-K-plasma-Methol-std5-03	257000	100	523000	1	0	107	107
20	DPHA_B_C-gal-galG-K-plasma-Methol-std5-04	236000	100	527000	1	0	97.2	97.2
21	DPHA_B_C-gal-galG-K-plasma-Methol-std6-01	2360000	1000	522000	1	0	992	99.2
22	DPHA_B_C-gal-galG-K-plasma-Methol-std6-02	2350000	1000	472000	1	1	1090	109
23	DPHA_B_C-gal-galG-K-plasma-Methol-std6-03	2650000	1000	526000	1	0	1100	110
24	DPHA_B_C-gal-galG-K-plasma-Methol-std6-04	2490000	1000	497000	1	0	1100	110
25	DPHA_B_C-gal-galG-K-plasma-Methol-std7-01	4270000	2000	483000	1	0	1940	97.1
26	DPHA_B_C-gal-galG-K-plasma-Methol-std7-02	2840000	2000	320000	1	1	1950	97.6
27	DPHA_B_C-gal-galG-K-plasma-Methol-std7-03	2710000	2000	314000	1	1	1890	94.6
28	DPHA_B_C-gal-galG-K-plasma-Methol-std7-04	4470000	2000	512000	1	0	1920	95.9
29	DPHA_B_C-gal-galG-K-rat-plasma-EtoAc-MP-24h-01	1720000		478000		0	789
30	DPHA_B_C-gal-galG-K-rat-plasma-EtoAc-MP-24h-02	1440000		562000		0	563
31	DPHA_B_C-gal-galG-K-rat-plasma-EtoAc-MP-24h-03	390000		634000		1	134
32	DPHA_B_C-gal-galG-K-rat-plasma-EtoAc-MP-24h-04	812000		595000		0	298
33	DPHA_B_C-gal-galG-K-rat-plasma-EtoAc-MP-24h-05	164000		643000		1	54.6		367.72	305.426	83.0595
34	DPHA_B_C-gal-galG-K-rat-plasma-EtoAc-MP-11h-01	344000		600000		0	125
35	DPHA_B_C-gal-galG-K-rat-plasma-EtoAc-MP-11h-02	1060000		511000		0	456
36	DPHA_B_C-gal-galG-K-rat-plasma-EtoAc-MP-11h-03	557000		553000		0	220
37	DPHA_B_C-gal-galG-K-rat-plasma-EtoAc-MP-11h-04	760000		591000		0	281
38	DPHA_B_C-gal-galG-K-rat-plasma-EtoAc-MP-11h-05	454000		326000		0	305		277.4	121.648	43.853
39	DPHA_B_C-gal-galG-K-rat-plasma-EtoAc-MP-8h-01	63700		483000		0	27.6
40	DPHA_B_C-gal-galG-K-rat-plasma-EtoAc-MP-8h-02	798000		504000		0	346
41	DPHA_B_C-gal-galG-K-rat-plasma-EtoAc-MP-8h-03	319000		561000		0	124
42	DPHA_B_C-gal-galG-K-rat-plasma-EtoAc-MP-8h-04	278000		587000		0	103
43	DPHA_B_C-gal-galG-K-rat-plasma-EtoAc-MP-8h-05	2090000		617000		0	743		268.72	290.456	108.089
44	DPHA_B_C-gal-galG-K-rat-plasma-EtoAc-MP-6h-01	114000		621000		1	39.2
45	DPHA_B_C-gal-galG-K-rat-plasma-EtoAc-MP-6h-02	1100000		610000		0	394
46	DPHA_B_C-gal-galG-K-rat-plasma-EtoAc-MP-6h-03	197000		534000		0	79.5
47	DPHA_B_C-gal-galG-K-rat-plasma-EtoAc-MP-6h-05	788000		325000		0	531		260.925	239.949	91.9609
48	DPHA_B_C-gal-galG-K-rat-plasma-EtoAc-MP-4h-01	166000		552000		0	64.6
49	DPHA_B_C-gal-galG-K-rat-plasma-EtoAc-MP-4h-02	165000		196000		0	184
50	DPHA_B_C-gal-galG-K-rat-plasma-EtoAc-MP-4h-03	473000		334000		0	310
51	DPHA_B_C-gal-galG-K-rat-plasma-EtoAc-MP-4h-04	155000		432000		1	77.5
52	DPHA_B_C-gal-galG-K-rat-plasma-EtoAc-MP-4h-05	45300		56200		1	176		162.42	99.0077	60.9578
53	DPHA_B_C-gal-galG-K-rat-plasma-EtoAc-MP-2h-01	483000		388000		0	272
54	DPHA_B_C-gal-galG-K-rat-plasma-EtoAc-MP-2h-02	17400		447000		1	7.17
55	DPHA_B_C-gal-galG-K-rat-plasma-EtoAc-MP-2h-03	36400		497000		0	14.7
56	DPHA_B_C-gal-galG-K-rat-plasma-EtoAc-MP-2h-04	589000		305000		0	423
57	DPHA_B_C-gal-galG-K-rat-plasma-EtoAc-MP-2h-05	18900		389000		0	9.3		145.234	192.225	132.356
58	DPHA_B_C-gal-galG-K-rat-plasma-EtoAc-MP-1h-01	167000		502000		1	71.7
59	DPHA_B_C-gal-galG-K-rat-plasma-EtoAc-MP-1h-02	7780		223000		1	6.31
60	DPHA_B_C-gal-galG-K-rat-plasma-EtoAc-MP-1h-03	585000		251000		0	511
61	DPHA_B_C-gal-galG-K-rat-plasma-EtoAc-MP-1h-04	330000		521000		1	138
62	DPHA_B_C-gal-galG-K-rat-plasma-EtoAc-MP-1h-05	5850		225000		1	4.34		146.27	211.181	144.378
63	DPHA_B_C-gal-galG-K-rat-plasma-EtoAc-MP-30min-01	2270000		456000		0	1090
64	DPHA_B_C-gal-galG-K-rat-plasma-EtoAc-MP-30min-02	230000		441000		0	113
65	DPHA_B_C-gal-galG-K-rat-plasma-EtoAc-MP-30min-03	2740000		589000		1	1020
66	DPHA_B_C-gal-galG-K-rat-plasma-EtoAc-MP-30min-04	209000		496000		1	91.1
67	DPHA_B_C-gal-galG-K-rat-plasma-EtoAc-MP-30min-05	90100		383000		0	50.3		472.88	532.452	112.598
68	DPHA_B_C-gal-galG-K-rat-plasma-EtoAc-MP-15min-01	6360000		284000		0	4920
69	DPHA_B_C-gal-galG-K-rat-plasma-EtoAc-MP-15min-02	18600000		511000		0	8010
70	DPHA_B_C-gal-galG-K-rat-plasma-EtoAc-MP-15min-03	17100000		729000		0	5160
71	DPHA_B_C-gal-galG-K-rat-plasma-EtoAc-MP-15min-04	21400000		494000		0	9530
72	DPHA_B_C-gal-galG-K-rat-plasma-EtoAc-MP-15min-05	21200000		538000		0	8650		7254	2093.62	28.8615
73	DPHA_B_C-gal-galG-K-rat-plasma-EtoAc-MP-5min-01	12800000		455000		0	6200
74	DPHA_B_C-gal-galG-K-rat-plasma-EtoAc-MP-5min-02	6920000		316000		0	4810
75	DPHA_B_C-gal-galG-K-rat-plasma-EtoAc-MP-5min-03	7620000		687000		0	2440
76	DPHA_B_C-gal-galG-K-rat-plasma-EtoAc-MP-5min-04	10900000		584000		0	4100
77	DPHA_B_C-gal-galG-K-rat-plasma-EtoAc-MP-5min-05	14700000		566000		0	5690		4648	1474.47	31.7227
78	DPHA_B_C-gal-galG-K-rat-plasma-6d-EtoAc-MP-4h-01	2770000		742000		0	819	4914
79	DPHA_B_C-gal-galG-K-rat-plasma-6d-EtoAc-MP-4h-02	2650000		812000		0	716	4296
80	DPHA_B_C-gal-galG-K-rat-plasma-6d-EtoAc-MP-4h-03	1040000		333000		0	682	4092
81	DPHA_B_C-gal-galG-K-rat-plasma-6d-EtoAc-MP-4h-04	2660000		968000		0	602	3612
82	DPHA_B_C-gal-galG-K-rat-plasma-6d-EtoAc-MP-4h-05	2340000		1220000		0	422	2532	3889.2	891.019	22.9101
83	DPHA_B_C-gal-galG-K-rat-plasma-6d-EtoAc-MP-2h-01	2240000		448000		0	1100	6600
84	DPHA_B_C-gal-galG-K-rat-plasma-6d-EtoAc-MP-2h-02	2610000		763000		0	751	4506
85	DPHA_B_C-gal-galG-K-rat-plasma-6d-EtoAc-MP-2h-03	6780000		765000		0	1950	11700
86	DPHA_B_C-gal-galG-K-rat-plasma-6d-EtoAc-MP-2h-04	4320000		371000		0	2560	15360
87	DPHA_B_C-gal-galG-K-rat-plasma-6d-EtoAc-MP-2h-05	3110000		682000		0	999	5994	8832	4543.97	51.4489
88	DPHA_B_C-gal-galG-K-rat-plasma-6d-EtoAc-MP-1h-01	557000		333000		0	366	2196
89	DPHA_B_C-gal-galG-K-rat-plasma-6d-EtoAc-MP-1h-02	5830000		663000		0	1930	11580
90	DPHA_B_C-gal-galG-K-rat-plasma-6d-EtoAc-MP-1h-03	4420000		792000		0	1230	7380
91	DPHA_B_C-gal-galG-K-rat-plasma-6d-EtoAc-MP-1h-04	1220000		352000		0	760	4560
92	DPHA_B_C-gal-galG-K-rat-plasma-6d-EtoAc-MP-1h-05	3620000		644000		0	1230	7380	6619.2	3520.38	53.1843
93	DPHA_B_C-gal-galG-K-rat-plasma-6d-EtoAc-MP-30min-01	5940000		812000		0	1610	9660
94	DPHA_B_C-gal-galG-K-rat-plasma-6d-EtoAc-MP-30min-02	5760000		710000		0	1780	10680
95	DPHA_B_C-gal-galG-K-rat-plasma-6d-EtoAc-MP-30min-03	3070000		845000		0	797	4782
96	DPHA_B_C-gal-galG-K-rat-plasma-6d-EtoAc-MP-30min-04	2700000		846000		0	701	4206
97	DPHA_B_C-gal-galG-K-rat-plasma-6d-EtoAc-MP-30min-05	4590000		727000		0	1390	8340	7533.6	2903.27	38.5376
98	DPHA_B_C-gal-galG-K-rat-plasma-6d-EtoAc-MP-15min-01	5260000		838000		0	1380	8280
99	DPHA_B_C-gal-galG-K-rat-plasma-6d-EtoAc-MP-15min-02	6580000		857000		0	1690	10140
100	DPHA_B_C-gal-galG-K-rat-plasma-6d-EtoAc-MP-15min-03	5050000		900000		0	1230	7380
101	DPHA_B_C-gal-galG-K-rat-plasma-6d-EtoAc-MP-15min-04	8960000		877000		0	2240	13440
102	DPHA_B_C-gal-galG-K-rat-plasma-6d-EtoAc-MP-15min-05	7760000		825000		0	2070	12420	10332	2597.18	25.1372
103	DPHA_B_C-gal-galG-K-rat-plasma-6d-EtoAc-MP-5min-01	1880000		258000		0	1600	9600
104	DPHA_B_C-gal-galG-K-rat-plasma-6d-EtoAc-MP-5min-02	1290000		293000		0	965	5790
105	DPHA_B_C-gal-galG-K-rat-plasma-6d-EtoAc-MP-5min-03	2150000		779000		0	604	3624
106	DPHA_B_C-gal-galG-K-rat-plasma-6d-EtoAc-MP-5min-04	2900000		717000		0	889	5334
107	DPHA_B_C-gal-galG-K-rat-plasma-6d-EtoAc-MP-5min-05	5720000		781000		0	1610	9660	6801.6	2705.36	39.7753
									concentration				accuracy
126	DPHA_B_C-gal-galG-K-plasma-EtoAc-MP-room-L-01	22700	12	359000	1	1	12.5	104
127	DPHA_B_C-gal-galG-K-plasma-EtoAc-MP-room-L-02	23000	12	373000	1	1	12.2	101
128	DPHA_B_C-gal-galG-K-plasma-EtoAc-MP-room-L-03	23200	12	410000	1	1	11.1	92.3
129	DPHA_B_C-gal-galG-K-plasma-EtoAc-MP-room-L-04	27500	12	415000	1	1	13.2	110
130	DPHA_B_C-gal-galG-K-plasma-EtoAc-MP-room-L-05	23700	12	414000	1	1	11.2	93.6	12.04	0.890505	7.39622		100.18	7.36695	7.35372
131	DPHA_B_C-gal-galG-K-plasma-EtoAc-MP-room-M-01	227000	120	465000	1	1	106	88.5
132	DPHA_B_C-gal-galG-K-plasma-EtoAc-MP-room-M-02	220000	120	400000	1	1	119	99.4
133	DPHA_B_C-gal-galG-K-plasma-EtoAc-MP-room-M-03	237000	120	511000	1	1	101	83.8
134	DPHA_B_C-gal-galG-K-plasma-EtoAc-MP-room-M-04	247000	120	500000	1	1	107	89.1
135	DPHA_B_C-gal-galG-K-plasma-EtoAc-MP-room-M-05	253000	120	551000	1	1	99.4	82.8	106.48	7.70402	7.23518		88.72	6.58612	7.42349
136	DPHA_B_C-gal-galG-K-plasma-EtoAc-MP-room-H-01	2330000	1200	500000	1	1	1020	85.1
137	DPHA_B_C-gal-galG-K-plasma-EtoAc-MP-room-H-02	2210000	1200	461000	1	1	1050	87.6
138	DPHA_B_C-gal-galG-K-plasma-EtoAc-MP-room-H-03	2110000	1200	445000	1	1	1040	86.9
139	DPHA_B_C-gal-galG-K-plasma-EtoAc-MP-room-H-04	2280000	1200	451000	1	1	1110	92.3
140	DPHA_B_C-gal-galG-K-plasma-EtoAc-MP-room-H-05	2230000	1200	448000	1	1	1090	91.1	1062	37.0135	3.48526		88.6	3.00333	3.38976
141	DPHA_B_C-gal-galG-K-plasma-EtoAc-MP-auto-L-01	25400	12	438000	1	1	11.3	94.5
142	DPHA_B_C-gal-galG-K-plasma-EtoAc-MP-auto-L-02	24000	12	465000	1	1	9.96	83
143	DPHA_B_C-gal-galG-K-plasma-EtoAc-MP-auto-L-03	27500	12	542000	1	1	9.78	81.5
144	DPHA_B_C-gal-galG-K-plasma-EtoAc-MP-auto-L-04	21600	12	345000	1	1	12.4	103
145	DPHA_B_C-gal-galG-K-plasma-EtoAc-MP-auto-L-05	19100	12	359000	1	1	10.3	86	10.748	1.09459	10.1841		89.6	9.02358	10.071
146	DPHA_B_C-gal-galG-K-plasma-EtoAc-MP-auto-M-01	240000	120	527000	1	1	98.8	82.4
147	DPHA_B_C-gal-galG-K-plasma-EtoAc-MP-auto-M-02	237000	120	472000	1	1	109	91
148	DPHA_B_C-gal-galG-K-plasma-EtoAc-MP-auto-M-03	233000	120	488000	1	1	103	86.2
149	DPHA_B_C-gal-galG-K-plasma-EtoAc-MP-auto-M-04	238000	120	438000	1	1	118	98.2
150	DPHA_B_C-gal-galG-K-plasma-EtoAc-MP-auto-M-05	131000	120	286000	1	1	99.6	83	105.68	7.97321	7.54467		88.16	6.56719	7.44917
151	DPHA_B_C-gal-galG-K-plasma-EtoAc-MP-auto-H-01	2270000	1200	430000	1	1	1160	96.8
152	DPHA_B_C-gal-galG-K-plasma-EtoAc-MP-auto-H-02	1790000	1200	392000	1	1	1000	83.6
154	DPHA_B_C-gal-galG-K-plasma-EtoAc-MP-auto-H-03	1450000	1200	315000	1	1	1010	84.4
155	DPHA_B_C-gal-galG-K-plasma-EtoAc-MP-auto-H-04	1440000	1200	286000	1	1	1100	92
156	DPHA_B_C-gal-galG-K-plasma-EtoAc-MP-auto-H-05	1100000	1200	230000	1	1	1050	87.7	1064	66.5582	6.25547		88.9	5.51815	6.20714
108	DPHA_B_C-gal-galG-K-plasma-EtoAc-MP-precision-day1-L-01	25100	12	357000	1	1	14.1	117
109	DPHA_B_C-gal-galG-K-plasma-EtoAc-MP-precision-day1-L-02	26900	12	384000	1	1	14	117
110	DPHA_B_C-gal-galG-K-plasma-EtoAc-MP-precision-day1-L-03	23400	12	381000	1	1	12.1	101
111	DPHA_B_C-gal-galG-K-plasma-EtoAc-MP-precision-day1-L-04	27200	12	410000	1	1	13.2	110
112	DPHA_B_C-gal-galG-K-plasma-EtoAc-MP-precision-day1-L-05	22600	12	405000	1	1	10.9	90.9
113	DPHA_B_C-gal-galG-K-plasma-EtoAc-MP-precision-day1-L-06	24500	12	400000	1	1	12.1	101	12.7333	1.25326	9.84237		106.15	10.3525	9.75274
114	DPHA_B_C-gal-galG-K-plasma-EtoAc-MP-precision-day1-M-01	240000	120	406000	1	1	129	107
115	DPHA_B_C-gal-galG-K-plasma-EtoAc-MP-precision-day1-M-02	269000	120	411000	1	1	142	119
116	DPHA_B_C-gal-galG-K-plasma-EtoAc-MP-precision-day1-M-03	239000	120	403000	1	1	129	108
117	DPHA_B_C-gal-galG-K-plasma-EtoAc-MP-precision-day1-M-04	238000	120	390000	1	1	133	111
118	DPHA_B_C-gal-galG-K-plasma-EtoAc-MP-precision-day1-M-05	163000	120	338000	1	1	105	87.1
119	DPHA_B_C-gal-galG-K-plasma-EtoAc-MP-precision-day1-M-06	171000	120	275000	1	1	135	113	128.833	12.6241	9.79875		107.517	10.8757	10.1154
120	DPHA_B_C-gal-galG-K-plasma-EtoAc-MP-precision-day1-H-01	3060000	1200	652000	1	1	1030	85.9
121	DPHA_B_C-gal-galG-K-plasma-EtoAc-MP-precision-day1-H-02	2710000	1200	551000	1	1	1080	89.8
122	DPHA_B_C-gal-galG-K-plasma-EtoAc-MP-precision-day1-H-03	2690000	1200	578000	1	1	1020	85
123	DPHA_B_C-gal-galG-K-plasma-EtoAc-MP-precision-day1-H-04	2530000	1200	526000	1	1	1050	87.8
124	DPHA_B_C-gal-galG-K-plasma-EtoAc-MP-precision-day1-H-05	2360000	1200	484000	1	1	1070	89.3
125	DPHA_B_C-gal-galG-K-plasma-EtoAc-MP-precision-day1-H-06	1990000	1200	372000	1	1	1180	97.9	1071.67	57.7639	5.3901		89.2833	4.61537	5.16936
157	DPHA_B_C-gal-galG-K-plasma-EtoAc-MP-precision-day2-L-01	16800	12	304000	1	1	10.8	89.9
158	DPHA_B_C-gal-galG-K-plasma-EtoAc-MP-precision-day2-L-02	15600	12	242000	1	1	12.8	107
159	DPHA_B_C-gal-galG-K-plasma-EtoAc-MP-precision-day2-L-03	15900	12	256000	1	1	12.3	102
160	DPHA_B_C-gal-galG-K-plasma-EtoAc-MP-precision-day2-L-04	11600	12	195000	1	1	11.7	97.2
161	DPHA_B_C-gal-galG-K-plasma-EtoAc-MP-precision-day2-L-05	9060	12	153000	1	1	11.6	96.7
162	DPHA_B_C-gal-galG-K-plasma-EtoAc-MP-precision-day2-L-06	9940	12	177000	1	1	11	91.6	11.7	0.758947	6.48672		97.4	6.38342	6.55382
163	DPHA_B_C-gal-galG-K-plasma-EtoAc-MP-precision-day2-M-01	89600	120	171000	1	1	114	94.7
164	DPHA_B_C-gal-galG-K-plasma-EtoAc-MP-precision-day2-M-02	70400	120	123000	1	1	125	104
165	DPHA_B_C-gal-galG-K-plasma-EtoAc-MP-precision-day2-M-03	84500	120	140000	1	1	131	109
166	DPHA_B_C-gal-galG-K-plasma-EtoAc-MP-precision-day2-M-04	138000	120	252000	1	1	119	99.1
167	DPHA_B_C-gal-galG-K-plasma-EtoAc-MP-precision-day2-M-05	119000	120	249000	1	1	104	86.7
168	DPHA_B_C-gal-galG-K-plasma-EtoAc-MP-precision-day2-M-06	105000	120	216000	1	1	105	87.5	116.333	10.8012	9.28473		96.8333	8.93167	9.22375
169	DPHA_B_C-gal-galG-K-plasma-EtoAc-MP-precision-day2-H-01	3130	12	62600	1	1	9.61	80.1
170	DPHA_B_C-gal-galG-K-plasma-EtoAc-MP-precision-day2-H-02	118	12	10400	1	0	1.14	9.48
171	DPHA_B_C-gal-galG-K-plasma-EtoAc-MP-precision-day2-H-03	33.8	12	4450	1	0	0.297	2.48
172	DPHA_B_C-gal-galG-K-plasma-EtoAc-MP-precision-day2-H-04	13400	12	221000	1	1	12	99.9
173	DPHA_B_C-gal-galG-K-plasma-EtoAc-MP-precision-day2-H-05	10600	12	163000	1	1	13	108
174	DPHA_B_C-gal-galG-K-plasma-EtoAc-MP-precision-day2-H-06	8050	12	130000	1	1	12.3	102	8.05783	5.80444	72.0348		66.9933	48.2315	71.9945
175	DPHA_B_C-gal-galG-K-plasma-EtoAc-MP-freeze-L-01	16300	12	269000	1	1	11.9	99.6
176	DPHA_B_C-gal-galG-K-plasma-EtoAc-MP-freeze-L-02	15500	12	234000	1	1	13.2	110
177	DPHA_B_C-gal-galG-K-plasma-EtoAc-MP-freeze-L-03	17400	12	260000	1	1	13.3	111	12.8	0.781025	6.10176		106.867	6.31295	5.90731
178	DPHA_B_C-gal-galG-K-plasma-EtoAc-MP-freeze-L-04	0	12	0	1	0
179	DPHA_B_C-gal-galG-K-plasma-EtoAc-MP-freeze-M-01	235000	120	440000	1	1	116	96.9
180	DPHA_B_C-gal-galG-K-plasma-EtoAc-MP-freeze-M-02	259000	120	540000	1	1	104	86.6
181	DPHA_B_C-gal-galG-K-plasma-EtoAc-MP-freeze-M-03	270000	120	550000	1	1	106	88.7
182	DPHA_B_C-gal-galG-K-plasma-EtoAc-MP-freeze-M-04	216000	120	437000	1	1	107	89.2
183	DPHA_B_C-gal-galG-K-plasma-EtoAc-MP-freeze-M-05	144000	120	317000	1	0	98.6	82.1	106.32	6.30968	5.93461		88.7	5.37262	6.05706
184	DPHA_B_C-gal-galG-K-plasma-EtoAc-MP-freeze-H-01	4410000	1200	844000	1	1	1150	95.5
185	DPHA_B_C-gal-galG-K-plasma-EtoAc-MP-freeze-H-02	4110000	1200	809000	1	1	1110	92.9
186	DPHA_B_C-gal-galG-K-plasma-EtoAc-MP-freeze-H-03	3590000	1200	729000	1	1	1080	90.2
187	DPHA_B_C-gal-galG-K-plasma-EtoAc-MP-freeze-H-04	2920000	1200	582000	1	1	1100	91.8
188	DPHA_B_C-gal-galG-K-plasma-EtoAc-MP-freeze-H-05	2490000	1200	466000	1	1	1170	97.8	1122	37.0135	3.29889		93.64	3.02209	3.22734
189	DPHA_B_C-gal-galG-K-plasma-EtoAc-MP-precision-day3-L-01	2350000	1200	471000	1	1	1100	91.4
190	DPHA_B_C-gal-galG-K-plasma-EtoAc-MP-precision-day3-L-02	2050000	1200	384000	1	1	1170	97.7
191	DPHA_B_C-gal-galG-K-plasma-EtoAc-MP-precision-day3-L-03	1600000	1200	301000	1	1	1170	97.6
192	DPHA_B_C-gal-galG-K-plasma-EtoAc-MP-precision-day3-L-04	3450000	1200	763000	1	1	992	82.7
193	DPHA_B_C-gal-galG-K-plasma-EtoAc-MP-precision-day3-L-05	3280000	1200	719000	1	1	1000	83.3
194	DPHA_B_C-gal-galG-K-plasma-EtoAc-MP-precision-day3-L-06	1780000	1200	373000	1	1	1050	87.2	1080.33	79.5529	7.36374		89.9833	6.70863	7.45541
195	DPHA_B_C-gal-galG-K-plasma-EtoAc-MP-precision-day3-M-01	407000	120	813000	1	1	109	90.5
196	DPHA_B_C-gal-galG-K-plasma-EtoAc-MP-precision-day3-M-02	227000	120	445000	1	1	111	92.2
197	DPHA_B_C-gal-galG-K-plasma-EtoAc-MP-precision-day3-M-03	187000	120	330000	1	1	123	103
198	DPHA_B_C-gal-galG-K-plasma-EtoAc-MP-precision-day3-M-04	346000	120	638000	1	1	118	98.2
199	DPHA_B_C-gal-galG-K-plasma-EtoAc-MP-precision-day3-M-05	394000	120	786000	1	1	109	90.8
200	DPHA_B_C-gal-galG-K-plasma-EtoAc-MP-precision-day3-M-06	397000	120	859000	1	1	100	83.6	111.667	7.99166	7.15671		93.05	6.73966	7.24305
201	DPHA_B_C-gal-galG-K-plasma-EtoAc-MP-precision-day3-H-01	3540000	1200	791000	1	1	983	81.9
202	DPHA_B_C-gal-galG-K-plasma-EtoAc-MP-precision-day3-H-02	3530000	1200	617000	1	1	1260	105
203	DPHA_B_C-gal-galG-K-plasma-EtoAc-MP-precision-day3-H-03	3580000	1200	637000	1	1	1230	103
204	DPHA_B_C-gal-galG-K-plasma-EtoAc-MP-precision-day3-H-04	3620000	1200	645000	1	1	1230	103
205	DPHA_B_C-gal-galG-K-plasma-EtoAc-MP-precision-day3-H-05	3570000	1200	770000	1	1	1020	84.9
206	DPHA_B_C-gal-galG-K-plasma-EtoAc-MP-precision-day3-H-06	3580000	1200	764000	1	1	1030	85.7	1125.5	126.876	11.2728		93.9167	10.7802	11.4785
227	DPHA_B_C-gal-galG-K-plasma-EtoAc-MP-set1-L-01	21000		1230		1	3750
228	DPHA_B_C-gal-galG-K-plasma-EtoAc-MP-set1-L-02	21700		968		1	4920
229	DPHA_B_C-gal-galG-K-plasma-EtoAc-MP-set1-L-03			709		1	3230
230	DPHA_B_C-gal-galG-K-plasma-EtoAc-MP-set1-L-04	19500		332		1	12500
231	DPHA_B_C-gal-galG-K-plasma-EtoAc-MP-set1-L-05			445		1	3870		20733.3	1123.98	5.42113
232	DPHA_B_C-gal-galG-K-plasma-EtoAc-MP-set1-M-01			464		1	42700
233	DPHA_B_C-gal-galG-K-plasma-EtoAc-MP-set1-M-02	243000		614		1	78100
234	DPHA_B_C-gal-galG-K-plasma-EtoAc-MP-set1-M-03	242000		250		1	194000
235	DPHA_B_C-gal-galG-K-plasma-EtoAc-MP-set1-M-04	234000		709		1	64900
236	DPHA_B_C-gal-galG-K-plasma-EtoAc-MP-set1-M-05			501		1	44500		239667	4932.88	2.05823
237	DPHA_B_C-gal-galG-K-plasma-EtoAc-MP-set1-H-01			270		1	862000
238	DPHA_B_C-gal-galG-K-plasma-EtoAc-MP-set1-H-02	2190000		270		1	1580000
239	DPHA_B_C-gal-galG-K-plasma-EtoAc-MP-set1-H-03			408		1	579000
240	DPHA_B_C-gal-galG-K-plasma-EtoAc-MP-set1-H-04	2310000		613		1	751000
241	DPHA_B_C-gal-galG-K-plasma-EtoAc-MP-set1-H-05	2320000		507		1	967000		2.27333e+06	72341.8	3.18219
242	DPHA_B_C-gal-galG-K-plasma-EtoAc-MP-IS-set1-01	7170		1170000		0	< 0
243	DPHA_B_C-gal-galG-K-plasma-EtoAc-MP-IS-set1-02	2430		1170000		0	< 0
244	DPHA_B_C-gal-galG-K-plasma-EtoAc-MP-IS-set1-03	1500		1160000		0	< 0
245	DPHA_B_C-gal-galG-K-plasma-EtoAc-MP-IS-set1-04	1350		1170000		0	< 0
246	DPHA_B_C-gal-galG-K-plasma-EtoAc-MP-IS-set1-05	1010		1210000		0	< 0		1176000	19493.6	1.65762
	DPHA_B_C-gal-galG-K-plasma-EtoAc-MP-set2-L-01	21300		1390		0	6320						97.1429
	DPHA_B_C-gal-galG-K-plasma-EtoAc-MP-set2-L-02	23200		1170		0	6860						106.912
	DPHA_B_C-gal-galG-K-plasma-EtoAc-MP-set2-L-03	24600		850		0	9610
	DPHA_B_C-gal-galG-K-plasma-EtoAc-MP-set2-L-04	19800		689		0	10700						101.538
	DPHA_B_C-gal-galG-K-plasma-EtoAc-MP-set2-L-05	20400		371		0	20800		21600	2615.34	12.1081			101.865	4.89295	4.80339
	DPHA_B_C-gal-galG-K-plasma-EtoAc-MP-set2-M-01	234000		571		0	117000
	DPHA_B_C-gal-galG-K-plasma-EtoAc-MP-set2-M-02	264000		771		0	88000						108.642
	DPHA_B_C-gal-galG-K-plasma-EtoAc-MP-set2-M-03	254000		751		0	84700						104.959
	DPHA_B_C-gal-galG-K-plasma-EtoAc-MP-set2-M-04	261000		599		0	110000						111.538
	DPHA_B_C-gal-galG-K-plasma-EtoAc-MP-set2-M-05	237000		754		0	84800		250000	13765.9	5.50636			108.38	3.29772	3.04275
	DPHA_B_C-gal-galG-K-plasma-EtoAc-MP-set2-H-01	2660000		625		0	1030000
	DPHA_B_C-gal-galG-K-plasma-EtoAc-MP-set2-H-02	2680000		591		0	1080000						122.374
	DPHA_B_C-gal-galG-K-plasma-EtoAc-MP-set2-H-03	2500000		812		0	738000
	DPHA_B_C-gal-galG-K-plasma-EtoAc-MP-set2-H-04	2440000		729		0	822000						105.628
	DPHA_B_C-gal-galG-K-plasma-EtoAc-MP-set2-H-05	2290000		833		0	738000		2514000	161802	6.43605		98.7069	108.903	12.169	11.1741
	DPHA_B_C-gal-galG-K-plasma-EtoAc-MP-IS-set2-01	12700		1030000		0	1.32						88.0342
	DPHA_B_C-gal-galG-K-plasma-EtoAc-MP-IS-set2-02	12600		1030000		0	1.31						88.0342
	DPHA_B_C-gal-galG-K-plasma-EtoAc-MP-IS-set2-03	8520		1020000		0	0.472						87.931
	DPHA_B_C-gal-galG-K-plasma-EtoAc-MP-IS-set2-04	15300		1020000		0	1.92						87.1795
	DPHA_B_C-gal-galG-K-plasma-EtoAc-MP-IS-set2-05	12400		1060000		0	1.21		1032000	16431.7	1.59222		87.6033	87.7564	0.367796	0.41911
	DPHA_B_C-gal-galG-K-plasma-EtoAc-MP-set3-L-01	22700											106.573
	DPHA_B_C-gal-galG-K-plasma-EtoAc-MP-set3-L-02	23000											99.1379
	DPHA_B_C-gal-galG-K-plasma-EtoAc-MP-set3-L-03	23200											94.3089
	DPHA_B_C-gal-galG-K-plasma-EtoAc-MP-set3-L-04	21600											109.091
	DPHA_B_C-gal-galG-K-plasma-EtoAc-MP-set3-L-05	19100											93.6275	100.548	7.03717	6.99885
	DPHA_B_C-gal-galG-K-plasma-EtoAc-MP-set3-M-01	227000											97.0085
	DPHA_B_C-gal-galG-K-plasma-EtoAc-MP-set3-M-02	220000											83.3333
	DPHA_B_C-gal-galG-K-plasma-EtoAc-MP-set3-M-03	237000											93.3071
	DPHA_B_C-gal-galG-K-plasma-EtoAc-MP-set3-M-04	247000											94.636
	DPHA_B_C-gal-galG-K-plasma-EtoAc-MP-set3-M-05	253000											106.751	95.0072	8.38497	8.82561
	DPHA_B_C-gal-galG-K-plasma-EtoAc-MP-set3-H-01	2330000											87.594
	DPHA_B_C-gal-galG-K-plasma-EtoAc-MP-set3-H-02	2210000											82.4627
	DPHA_B_C-gal-galG-K-plasma-EtoAc-MP-set3-H-03	2110000											84.4
	DPHA_B_C-gal-galG-K-plasma-EtoAc-MP-set3-H-04	2280000											93.4426
	DPHA_B_C-gal-galG-K-plasma-EtoAc-MP-set3-H-05	2230000											97.3799	89.0558	6.24135	7.00835
	DPHA_B_C-gal-galG-K-plasma-EtoAc-MP-IS-set3-01			410000									39.8058
	DPHA_B_C-gal-galG-K-plasma-EtoAc-MP-IS-set3-02			415000									40.2913
	DPHA_B_C-gal-galG-K-plasma-EtoAc-MP-IS-set3-03			414000									40.5882
	DPHA_B_C-gal-galG-K-plasma-EtoAc-MP-IS-set3-04			465000									45.5882
	DPHA_B_C-gal-galG-K-plasma-EtoAc-MP-IS-set3-05			400000					420800	25410.6	6.03865		37.7358	40.8019	2.89863	7.10416

## Sheet: galangin-3-o-Glu
	Sample Name	Analyte Peak Area (counts)	Analyte Concentration (ng/mL)	IS Peak Area (counts)	Use Record	Record Modified	Calculated Concentration (ng/mL)	Accuracy (%)
1	DPHA_B_C-gal-galG-K-plasma-Methol-std1-01	6580	2	264000	1	1	2.32	116
2	DPHA_B_C-gal-galG-K-plasma-Methol-std1-02	9510	2	445000	1	1	2	99.8
3	DPHA_B_C-gal-galG-K-plasma-Methol-std1-03	11400	2	491000	1	1	2.17	108
4	DPHA_B_C-gal-galG-K-plasma-Methol-std1-04	6540	2	312000	1	1	1.96	98.1
5	DPHA_B_C-gal-galG-K-plasma-Methol-std2-01	15800	5	259000	1	1	5.63	113
6	DPHA_B_C-gal-galG-K-plasma-Methol-std2-02	26600	5	518000	1	0	4.75	95
7	DPHA_B_C-gal-galG-K-plasma-Methol-std2-03	28500	5	496000	1	0	5.31	106
8	DPHA_B_C-gal-galG-K-plasma-Methol-std2-04	28700	5	522000	1	0	5.09	102
9	DPHA_B_C-gal-galG-K-plasma-Methol-std3-01	55600	10	514000	1	0	9.96	99.6
10	DPHA_B_C-gal-galG-K-plasma-Methol-std3-02	55000	10	538000	1	0	9.43	94.3
11	DPHA_B_C-gal-galG-K-plasma-Methol-std3-03	57600	10	513000	1	0	10.4	104
12	DPHA_B_C-gal-galG-K-plasma-Methol-std3-04	23200	10	248000	1	1	8.63	86.3
13	DPHA_B_C-gal-galG-K-plasma-Methol-std4-01	91200	20	400000	1	0	21	105
14	DPHA_B_C-gal-galG-K-plasma-Methol-std4-02	44000	20	220000	1	0	18.4	92.1
15	DPHA_B_C-gal-galG-K-plasma-Methol-std4-03	45900	20	222000	1	0	19.1	95.4
16	DPHA_B_C-gal-galG-K-plasma-Methol-std4-04	62800	20	290000	1	0	19.9	99.7
17	DPHA_B_C-gal-galG-K-plasma-Methol-std5-01	519000	100	494000	1	0	96.7	96.7
18	DPHA_B_C-gal-galG-K-plasma-Methol-std5-02	509000	100	532000	1	0	88	88
19	DPHA_B_C-gal-galG-K-plasma-Methol-std5-03	548000	100	523000	1	0	96.3	96.3
20	DPHA_B_C-gal-galG-K-plasma-Methol-std5-04	505000	100	527000	1	0	88.2	88.2
21	DPHA_B_C-gal-galG-K-plasma-Methol-std6-01	5500000	1000	522000	1	0	969	96.9
22	DPHA_B_C-gal-galG-K-plasma-Methol-std6-02	5860000	1000	472000	1	1	1140	114
23	DPHA_B_C-gal-galG-K-plasma-Methol-std6-03	6350000	1000	526000	1	0	1110	111
24	DPHA_B_C-gal-galG-K-plasma-Methol-std6-04	5850000	1000	497000	1	0	1080	108
25	DPHA_B_C-gal-galG-K-plasma-Methol-std7-01	10400000	2000	483000	1	0	1980	98.8
26	DPHA_B_C-gal-galG-K-plasma-Methol-std7-02	6690000	2000	320000	1	0	1920	96.1
27	DPHA_B_C-gal-galG-K-plasma-Methol-std7-03	6300000	2000	314000	1	0	1850	92.3
28	DPHA_B_C-gal-galG-K-plasma-Methol-std7-04	11000000	2000	512000	1	0	1990	99.3
29	DPHA_B_C-gal-galG-K-rat-plasma-EtoAc-MP-24h-01	5120000		478000		0	984
30	DPHA_B_C-gal-galG-K-rat-plasma-EtoAc-MP-24h-02	1340000		562000		0	220
31	DPHA_B_C-gal-galG-K-rat-plasma-EtoAc-MP-24h-03	482000		634000		0	70
32	DPHA_B_C-gal-galG-K-rat-plasma-EtoAc-MP-24h-04	2230000		595000		0	344
33	DPHA_B_C-gal-galG-K-rat-plasma-EtoAc-MP-24h-05	339000		643000		0	48.6		333.32	382.996	114.903
34	DPHA_B_C-gal-galG-K-rat-plasma-EtoAc-MP-11h-01	297000		600000		0	45.6
35	DPHA_B_C-gal-galG-K-rat-plasma-EtoAc-MP-11h-02	1290000		511000		0	232
36	DPHA_B_C-gal-galG-K-rat-plasma-EtoAc-MP-11h-03	295000		553000		0	49
37	DPHA_B_C-gal-galG-K-rat-plasma-EtoAc-MP-11h-04	780000		591000		1	121
38	DPHA_B_C-gal-galG-K-rat-plasma-EtoAc-MP-11h-05	414000		326000		0	117		112.92	75.6302	66.9768
39	DPHA_B_C-gal-galG-K-rat-plasma-EtoAc-MP-8h-01	56200		483000		0	10.7
40	DPHA_B_C-gal-galG-K-rat-plasma-EtoAc-MP-8h-02	1010000		504000		0	184
41	DPHA_B_C-gal-galG-K-rat-plasma-EtoAc-MP-8h-03	258000		561000		0	42.4
42	DPHA_B_C-gal-galG-K-rat-plasma-EtoAc-MP-8h-04	158000		587000		1	24.8
43	DPHA_B_C-gal-galG-K-rat-plasma-EtoAc-MP-8h-05	2600000		617000		1	388		129.98	160.042	123.128
44	DPHA_B_C-gal-galG-K-rat-plasma-EtoAc-MP-6h-01	52400		621000		0	7.8
45	DPHA_B_C-gal-galG-K-rat-plasma-EtoAc-MP-6h-02	1180000		610000		0	179
46	DPHA_B_C-gal-galG-K-rat-plasma-EtoAc-MP-6h-03	215000		534000		0	37
47	DPHA_B_C-gal-galG-K-rat-plasma-EtoAc-MP-6h-05	1220000		325000		0	345		142.2	154.502	108.651
48	DPHA_B_C-gal-galG-K-rat-plasma-EtoAc-MP-4h-01	115000		552000		0	19.2
49	DPHA_B_C-gal-galG-K-rat-plasma-EtoAc-MP-4h-02	131000		196000		0	61.5
50	DPHA_B_C-gal-galG-K-rat-plasma-EtoAc-MP-4h-03	506000		334000		0	139
51	DPHA_B_C-gal-galG-K-rat-plasma-EtoAc-MP-4h-04	160000		432000		0	34.1
52	DPHA_B_C-gal-galG-K-rat-plasma-EtoAc-MP-4h-05	66100		56200		0	108		72.36	50.2963	69.5084
53	DPHA_B_C-gal-galG-K-rat-plasma-EtoAc-MP-2h-01	284000		388000		0	67.3
54	DPHA_B_C-gal-galG-K-rat-plasma-EtoAc-MP-2h-02	33100		447000		0	6.85
55	DPHA_B_C-gal-galG-K-rat-plasma-EtoAc-MP-2h-03	61700		497000		0	11.4
56	DPHA_B_C-gal-galG-K-rat-plasma-EtoAc-MP-2h-04	363000		305000		0	110
57	DPHA_B_C-gal-galG-K-rat-plasma-EtoAc-MP-2h-05	64500		389000		0	15.3		42.17	45.1351	107.031
58	DPHA_B_C-gal-galG-K-rat-plasma-EtoAc-MP-1h-01	108000		502000		0	19.8
59	DPHA_B_C-gal-galG-K-rat-plasma-EtoAc-MP-1h-02	16800		223000		0	6.96
60	DPHA_B_C-gal-galG-K-rat-plasma-EtoAc-MP-1h-03	467000		251000		0	171
61	DPHA_B_C-gal-galG-K-rat-plasma-EtoAc-MP-1h-04	133000		521000		0	23.6
62	DPHA_B_C-gal-galG-K-rat-plasma-EtoAc-MP-1h-05	18600		225000		0	7.61		45.794	70.3756	153.679
63	DPHA_B_C-gal-galG-K-rat-plasma-EtoAc-MP-30min-01	1370000		456000		0	277
64	DPHA_B_C-gal-galG-K-rat-plasma-EtoAc-MP-30min-02	119000		441000		0	25
65	DPHA_B_C-gal-galG-K-rat-plasma-EtoAc-MP-30min-03	3110000		589000		0	485
66	DPHA_B_C-gal-galG-K-rat-plasma-EtoAc-MP-30min-04	75100		496000		0	14
67	DPHA_B_C-gal-galG-K-rat-plasma-EtoAc-MP-30min-05	82300		383000		0	19.8		164.16	211.202	128.656
68	DPHA_B_C-gal-galG-K-rat-plasma-EtoAc-MP-15min-01	8520000		284000		0	2760
69	DPHA_B_C-gal-galG-K-rat-plasma-EtoAc-MP-15min-02	28700000		511000		0	5170
70	DPHA_B_C-gal-galG-K-rat-plasma-EtoAc-MP-15min-03	27900000		729000		0	3520
71	DPHA_B_C-gal-galG-K-rat-plasma-EtoAc-MP-15min-04	28800000		494000		0	5350
72	DPHA_B_C-gal-galG-K-rat-plasma-EtoAc-MP-15min-05	31600000		538000		0	5400		4440	1219.77	27.4724
73	DPHA_B_C-gal-galG-K-rat-plasma-EtoAc-MP-5min-01	22800000		455000		0	4610
74	DPHA_B_C-gal-galG-K-rat-plasma-EtoAc-MP-5min-02	9860000		316000		0	2870
75	DPHA_B_C-gal-galG-K-rat-plasma-EtoAc-MP-5min-03	13700000		687000		0	1840
76	DPHA_B_C-gal-galG-K-rat-plasma-EtoAc-MP-5min-04	17100000		584000		0	2690
77	DPHA_B_C-gal-galG-K-rat-plasma-EtoAc-MP-5min-05	22300000		566000		0	3620		3126	1043.52	33.3819
78	DPHA_B_C-gal-galG-K-rat-plasma-6d-EtoAc-MP-4h-01	2840000		742000		0	351	2106
79	DPHA_B_C-gal-galG-K-rat-plasma-6d-EtoAc-MP-4h-02	2600000		812000		0	295	1770
80	DPHA_B_C-gal-galG-K-rat-plasma-6d-EtoAc-MP-4h-03	1210000		333000		0	334	2004
81	DPHA_B_C-gal-galG-K-rat-plasma-6d-EtoAc-MP-4h-04	2840000		968000		0	270	1620
82	DPHA_B_C-gal-galG-K-rat-plasma-6d-EtoAc-MP-4h-05	3020000		1220000		0	228	1368	1773.6	296.518	16.7184
83	DPHA_B_C-gal-galG-K-rat-plasma-6d-EtoAc-MP-2h-01	2670000		448000		0	548	3288
84	DPHA_B_C-gal-galG-K-rat-plasma-6d-EtoAc-MP-2h-02	2390000		763000		0	288	1728
85	DPHA_B_C-gal-galG-K-rat-plasma-6d-EtoAc-MP-2h-03	8570000		765000		0	1030	6180
86	DPHA_B_C-gal-galG-K-rat-plasma-6d-EtoAc-MP-2h-04	4340000		371000		0	1080	6480
87	DPHA_B_C-gal-galG-K-rat-plasma-6d-EtoAc-MP-2h-05	5550000		682000		0	748	4488	4432.8	1992.07	44.9392
88	DPHA_B_C-gal-galG-K-rat-plasma-6d-EtoAc-MP-1h-01	546000		333000		0	151	906
89	DPHA_B_C-gal-galG-K-rat-plasma-6d-EtoAc-MP-1h-02	7420000		663000		0	1030	6180
90	DPHA_B_C-gal-galG-K-rat-plasma-6d-EtoAc-MP-1h-03	6260000		792000		0	727	4362
91	DPHA_B_C-gal-galG-K-rat-plasma-6d-EtoAc-MP-1h-04	1180000		352000		0	307	1842
92	DPHA_B_C-gal-galG-K-rat-plasma-6d-EtoAc-MP-1h-05	4980000		644000		0	711	4266	3511.2	2120.69	60.398
93	DPHA_B_C-gal-galG-K-rat-plasma-6d-EtoAc-MP-30min-01	6560000		812000		0	743	4458
94	DPHA_B_C-gal-galG-K-rat-plasma-6d-EtoAc-MP-30min-02	7460000		710000		0	967	5802
95	DPHA_B_C-gal-galG-K-rat-plasma-6d-EtoAc-MP-30min-03	4250000		845000		0	462	2772
96	DPHA_B_C-gal-galG-K-rat-plasma-6d-EtoAc-MP-30min-04	2730000		846000		0	297	1782
97	DPHA_B_C-gal-galG-K-rat-plasma-6d-EtoAc-MP-30min-05	6660000		727000		0	842	5052	3973.2	1657.38	41.7139
98	DPHA_B_C-gal-galG-K-rat-plasma-6d-EtoAc-MP-15min-01	6500000		838000		0	713	4278
99	DPHA_B_C-gal-galG-K-rat-plasma-6d-EtoAc-MP-15min-02	8890000		857000		0	953	5718
100	DPHA_B_C-gal-galG-K-rat-plasma-6d-EtoAc-MP-15min-03	7540000		900000		0	770	4620
101	DPHA_B_C-gal-galG-K-rat-plasma-6d-EtoAc-MP-15min-04	11400000		877000		0	1190	7140
102	DPHA_B_C-gal-galG-K-rat-plasma-6d-EtoAc-MP-15min-05	11000000		825000		0	1220	7320	5815.2	1398.25	24.0448
103	DPHA_B_C-gal-galG-K-rat-plasma-6d-EtoAc-MP-5min-01	2600000		258000		0	925	5550
104	DPHA_B_C-gal-galG-K-rat-plasma-6d-EtoAc-MP-5min-02	1790000		293000		0	563	3378
105	DPHA_B_C-gal-galG-K-rat-plasma-6d-EtoAc-MP-5min-03	3560000		779000		0	420	2520
106	DPHA_B_C-gal-galG-K-rat-plasma-6d-EtoAc-MP-5min-04	4060000		717000		0	521	3126
107	DPHA_B_C-gal-galG-K-rat-plasma-6d-EtoAc-MP-5min-05	8020000		781000		0	945	5670	4048.8	1459.51	36.0479
									concentration				accuracy
126	DPHA_B_C-gal-galG-K-plasma-EtoAc-MP-room-L-01	44300	12	359000	1	1	11.4	94.9
127	DPHA_B_C-gal-galG-K-plasma-EtoAc-MP-room-L-02	43100	12	373000	1	1	10.6	88.7
128	DPHA_B_C-gal-galG-K-plasma-EtoAc-MP-room-L-03	48000	12	410000	1	1	10.8	90
129	DPHA_B_C-gal-galG-K-plasma-EtoAc-MP-room-L-04	46000	12	415000	1	1	10.2	85.2
130	DPHA_B_C-gal-galG-K-plasma-EtoAc-MP-room-L-05	44800	12	414000	1	1	10	83.3	10.6	0.547723	5.16719		88.42	4.50411	5.09399
131	DPHA_B_C-gal-galG-K-plasma-EtoAc-MP-room-M-01	470000	120	371000	1	1	116	97
132	DPHA_B_C-gal-galG-K-plasma-EtoAc-MP-room-M-02	473000	120	400000	1	1	109	90.6
133	DPHA_B_C-gal-galG-K-plasma-EtoAc-MP-room-M-03	488000	120	388000	1	1	116	96.4
134	DPHA_B_C-gal-galG-K-plasma-EtoAc-MP-room-M-04	509000	120	402000	1	1	116	96.9
135	DPHA_B_C-gal-galG-K-plasma-EtoAc-MP-room-M-05	493000	120	414000	1	1	110	91.3	113.4	3.57771	3.15495		94.44	3.20359	3.3922
136	DPHA_B_C-gal-galG-K-plasma-EtoAc-MP-room-H-01	4930000	1200	458000	1	1	989	82.5
137	DPHA_B_C-gal-galG-K-plasma-EtoAc-MP-room-H-02	4850000	1200	375000	1	1	1190	99.1
138	DPHA_B_C-gal-galG-K-plasma-EtoAc-MP-room-H-03	5020000	1200	445000	1	1	1040	86.4
139	DPHA_B_C-gal-galG-K-plasma-EtoAc-MP-room-H-04	5050000	1200	451000	1	1	1030	85.8
140	DPHA_B_C-gal-galG-K-plasma-EtoAc-MP-room-H-05	5180000	1200	448000	1	1	1060	88.5	1061.8	76.1984	7.17634		88.46	6.32558	7.15078
141	DPHA_B_C-gal-galG-K-plasma-EtoAc-MP-auto-L-01	52900	12	438000	1	1	11.1	92.7
142	DPHA_B_C-gal-galG-K-plasma-EtoAc-MP-auto-L-02	47100	12	420000	1	1	10.3	86.1
143	DPHA_B_C-gal-galG-K-plasma-EtoAc-MP-auto-L-03	53600	12	411000	1	1	12	100
144	DPHA_B_C-gal-galG-K-plasma-EtoAc-MP-auto-L-04	43500	12	345000	1	1	11.6	97
145	DPHA_B_C-gal-galG-K-plasma-EtoAc-MP-auto-L-05	36400	12	300000	1	1	11.2	93.4	11.24	0.634823	5.64789		93.84	5.2281	5.57129
146	DPHA_B_C-gal-galG-K-plasma-EtoAc-MP-auto-M-01	485000	120	410000	1	1	109	90.7
147	DPHA_B_C-gal-galG-K-plasma-EtoAc-MP-auto-M-02	493000	120	428000	1	1	106	88.2
148	DPHA_B_C-gal-galG-K-plasma-EtoAc-MP-auto-M-03	478000	120	412000	1	1	107	88.8
149	DPHA_B_C-gal-galG-K-plasma-EtoAc-MP-auto-M-04	498000	120	438000	1	1	104	87
150	DPHA_B_C-gal-galG-K-plasma-EtoAc-MP-auto-M-05	276000	120	209000	1	1	121	101	109.4	6.73053	6.15222		91.14	5.67168	6.22305
151	DPHA_B_C-gal-galG-K-plasma-EtoAc-MP-auto-H-01	5090000	1200	430000	1	1	1090	90.7
152	DPHA_B_C-gal-galG-K-plasma-EtoAc-MP-auto-H-02	4080000	1200	281000	1	1	1330	111
154	DPHA_B_C-gal-galG-K-plasma-EtoAc-MP-auto-H-03	3230000	1200	238000	1	1	1250	104
155	DPHA_B_C-gal-galG-K-plasma-EtoAc-MP-auto-H-04	3140000	1200	286000	1	1	1010	84
156	DPHA_B_C-gal-galG-K-plasma-EtoAc-MP-auto-H-05	2200000	1200	186000	1	1	1090	90.6	1154	131.453	11.3911		96.06	11.0706	11.5247
108	DPHA_B_C-gal-galG-K-plasma-EtoAc-MP-precision-day1-L-01	53900	12	357000	1	1	13.9	116
109	DPHA_B_C-gal-galG-K-plasma-EtoAc-MP-precision-day1-L-02	50300	12	384000	1	1	12.1	101
110	DPHA_B_C-gal-galG-K-plasma-EtoAc-MP-precision-day1-L-03	51500	12	381000	1	1	12.4	104
111	DPHA_B_C-gal-galG-K-plasma-EtoAc-MP-precision-day1-L-04	61800	12	410000	1	1	13.9	116
112	DPHA_B_C-gal-galG-K-plasma-EtoAc-MP-precision-day1-L-05	54600	12	405000	1	1	12.4	104
113	DPHA_B_C-gal-galG-K-plasma-EtoAc-MP-precision-day1-L-06	59100	12	400000	1	1	13.6	114	13.05	0.836062	6.40661		109.167	6.88234	6.30444
114	DPHA_B_C-gal-galG-K-plasma-EtoAc-MP-precision-day1-M-01	518000	120	406000	1	1	117	97.9
115	DPHA_B_C-gal-galG-K-plasma-EtoAc-MP-precision-day1-M-02	597000	120	411000	1	1	134	111
116	DPHA_B_C-gal-galG-K-plasma-EtoAc-MP-precision-day1-M-03	568000	120	403000	1	1	130	108
117	DPHA_B_C-gal-galG-K-plasma-EtoAc-MP-precision-day1-M-04	550000	120	390000	1	1	130	108
118	DPHA_B_C-gal-galG-K-plasma-EtoAc-MP-precision-day1-M-05	352000	120	296000	1	1	109	91.1
119	DPHA_B_C-gal-galG-K-plasma-EtoAc-MP-precision-day1-M-06	381000	120	275000	1	0	127	106	124.5	9.52365	7.64952		103.667	7.58885	7.32044
120	DPHA_B_C-gal-galG-K-plasma-EtoAc-MP-precision-day1-H-01	8220000	1200	652000	1	1	1160	96.7
121	DPHA_B_C-gal-galG-K-plasma-EtoAc-MP-precision-day1-H-02	6780000	1200	551000	1	1	1130	94.2
122	DPHA_B_C-gal-galG-K-plasma-EtoAc-MP-precision-day1-H-03	6540000	1200	578000	1	0	1040	86.6
123	DPHA_B_C-gal-galG-K-plasma-EtoAc-MP-precision-day1-H-04	6210000	1200	526000	1	1	1090	90.4
124	DPHA_B_C-gal-galG-K-plasma-EtoAc-MP-precision-day1-H-05	5370000	1200	484000	1	1	1020	85
125	DPHA_B_C-gal-galG-K-plasma-EtoAc-MP-precision-day1-H-06	4370000	1200	372000	1	1	1080	90	1086.67	52.7889	4.85787		90.4833	4.42376	4.88903
157	DPHA_B_C-gal-galG-K-plasma-EtoAc-MP-precision-day2-L-01	31400	12	238000	1	1	12.2	101
158	DPHA_B_C-gal-galG-K-plasma-EtoAc-MP-precision-day2-L-02	28800	12	242000	1	1	11	91.5
159	DPHA_B_C-gal-galG-K-plasma-EtoAc-MP-precision-day2-L-03	29900	12	256000	1	1	10.8	89.6
160	DPHA_B_C-gal-galG-K-plasma-EtoAc-MP-precision-day2-L-04	23600	12	195000	1	1	11.2	93
161	DPHA_B_C-gal-galG-K-plasma-EtoAc-MP-precision-day2-L-05	19800	12	153000	1	1	11.9	99.2
162	DPHA_B_C-gal-galG-K-plasma-EtoAc-MP-precision-day2-L-06	17000	12	119000	1	1	13.2	110	11.7167	0.904249	7.71763		97.3833	7.61536	7.81998
163	DPHA_B_C-gal-galG-K-plasma-EtoAc-MP-precision-day2-M-01	166000	120	140000	1	1	109	90.6
164	DPHA_B_C-gal-galG-K-plasma-EtoAc-MP-precision-day2-M-02	158000	120	123000	1	1	119	99
165	DPHA_B_C-gal-galG-K-plasma-EtoAc-MP-precision-day2-M-03	195000	120	140000	1	1	128	107
166	DPHA_B_C-gal-galG-K-plasma-EtoAc-MP-precision-day2-M-04	309000	120	252000	1	1	113	94.1
167	DPHA_B_C-gal-galG-K-plasma-EtoAc-MP-precision-day2-M-05	278000	120	249000	1	1	103	85.6
168	DPHA_B_C-gal-galG-K-plasma-EtoAc-MP-precision-day2-M-06	211000	120	188000	1	1	103	86.2	112.5	9.75192	8.66838		93.75	8.20482	8.7518
169	DPHA_B_C-gal-galG-K-plasma-EtoAc-MP-precision-day2-H-01	6460	12	44100	1	1	13.5	113
170	DPHA_B_C-gal-galG-K-plasma-EtoAc-MP-precision-day2-H-02	361	12	2980	1	1	11.2	93.1
171	DPHA_B_C-gal-galG-K-plasma-EtoAc-MP-precision-day2-H-03	199	12	1900	1	1	9.68	80.7
172	DPHA_B_C-gal-galG-K-plasma-EtoAc-MP-precision-day2-H-04	27900	12	221000	1	1	11.6	97
173	DPHA_B_C-gal-galG-K-plasma-EtoAc-MP-precision-day2-H-05	22800	12	163000	1	1	12.9	107
174	DPHA_B_C-gal-galG-K-plasma-EtoAc-MP-precision-day2-H-06	19200	12	130000	1	1	13.7	114	12.0967	1.55411	12.8474		100.8	12.9558	12.8529
175	DPHA_B_C-gal-galG-K-plasma-EtoAc-MP-freeze-L-01	34900	12	269000	1	1	12	99.8
176	DPHA_B_C-gal-galG-K-plasma-EtoAc-MP-freeze-L-02	35700	12	234000	1	1	14	117
177	DPHA_B_C-gal-galG-K-plasma-EtoAc-MP-freeze-L-03	37500	12	260000	1	1	13.3	111	13.1	1.01489	7.74725		109.267	8.73002	7.98965
178	DPHA_B_C-gal-galG-K-plasma-EtoAc-MP-freeze-L-04	197	12	0	1	0
179	DPHA_B_C-gal-galG-K-plasma-EtoAc-MP-freeze-M-01	488000	120	440000	1	1	102	85
180	DPHA_B_C-gal-galG-K-plasma-EtoAc-MP-freeze-M-02	535000	120	432000	1	1	114	95.1
181	DPHA_B_C-gal-galG-K-plasma-EtoAc-MP-freeze-M-03	404000	120	316000	1	1	118	98
182	DPHA_B_C-gal-galG-K-plasma-EtoAc-MP-freeze-M-04	389000	120	314000	1	1	114	95
183	DPHA_B_C-gal-galG-K-plasma-EtoAc-MP-freeze-M-05	180000	120	167000	1	1	98.7	82.2	109.34	8.44855	7.72686		91.06	6.98627	7.67216
184	DPHA_B_C-gal-galG-K-plasma-EtoAc-MP-freeze-H-01	10400000	1200	844000	1	1	1130	94.6
185	DPHA_B_C-gal-galG-K-plasma-EtoAc-MP-freeze-H-02	9710000	1200	809000	1	1	1100	92
186	DPHA_B_C-gal-galG-K-plasma-EtoAc-MP-freeze-H-03	8310000	1200	729000	1	1	1050	87.3
187	DPHA_B_C-gal-galG-K-plasma-EtoAc-MP-freeze-H-04	6710000	1200	582000	1	1	1060	88.3
188	DPHA_B_C-gal-galG-K-plasma-EtoAc-MP-freeze-H-05	5470000	1200	466000	1	1	1080	90	1084	32.0936	2.96067		90.44	2.93138	3.24124
189	DPHA_B_C-gal-galG-K-plasma-EtoAc-MP-precision-day3-L-01	5350000	1200	471000	1	1	1040	87.1
190	DPHA_B_C-gal-galG-K-plasma-EtoAc-MP-precision-day3-L-02	4450000	1200	384000	1	1	1070	88.9
191	DPHA_B_C-gal-galG-K-plasma-EtoAc-MP-precision-day3-L-03	3520000	1200	301000	1	1	1080	89.7
192	DPHA_B_C-gal-galG-K-plasma-EtoAc-MP-precision-day3-L-04	7710000	1200	597000	1	1	1190	99
193	DPHA_B_C-gal-galG-K-plasma-EtoAc-MP-precision-day3-L-05	7250000	1200	573000	1	1	1160	96.9
194	DPHA_B_C-gal-galG-K-plasma-EtoAc-MP-precision-day3-L-06	3930000	1200	313000	1	1	1150	96.2	1115	59.5819	5.34367		92.9667	4.97902	5.35571
195	DPHA_B_C-gal-galG-K-plasma-EtoAc-MP-precision-day3-M-01	812000	120	651000	1	1	115	95.7
196	DPHA_B_C-gal-galG-K-plasma-EtoAc-MP-precision-day3-M-02	473000	120	361000	1	1	121	100
197	DPHA_B_C-gal-galG-K-plasma-EtoAc-MP-precision-day3-M-03	379000	120	330000	1	1	105	87.9
198	DPHA_B_C-gal-galG-K-plasma-EtoAc-MP-precision-day3-M-04	711000	120	638000	1	1	103	85.5
199	DPHA_B_C-gal-galG-K-plasma-EtoAc-MP-precision-day3-M-05	820000	120	635000	1	1	119	99
200	DPHA_B_C-gal-galG-K-plasma-EtoAc-MP-precision-day3-M-06	814000	120	614000	1	1	122	102	114.167	8.25631	7.23181		95.0167	6.79924	7.15584
201	DPHA_B_C-gal-galG-K-plasma-EtoAc-MP-precision-day3-H-01	7910000	1200	631000	1	1	1150	96
202	DPHA_B_C-gal-galG-K-plasma-EtoAc-MP-precision-day3-H-02	7830000	1200	617000	1	1	1170	97.3
203	DPHA_B_C-gal-galG-K-plasma-EtoAc-MP-precision-day3-H-03	7690000	1200	637000	1	1	1110	92.6
204	DPHA_B_C-gal-galG-K-plasma-EtoAc-MP-precision-day3-H-04	7980000	1200	645000	1	1	1140	94.8
205	DPHA_B_C-gal-galG-K-plasma-EtoAc-MP-precision-day3-H-05	7960000	1200	624000	1	1	1170	97.8
206	DPHA_B_C-gal-galG-K-plasma-EtoAc-MP-precision-day3-H-06	7880000	1200	621000	1	1	1170	97.2	1151.67	24.0139	2.08514		95.95	1.96749	2.05053
227	DPHA_B_C-gal-galG-K-plasma-EtoAc-MP-set1-L-01	53100		1230		0	3870
228	DPHA_B_C-gal-galG-K-plasma-EtoAc-MP-set1-L-02	52900		968		0	4880
229	DPHA_B_C-gal-galG-K-plasma-EtoAc-MP-set1-L-03			709		0	5430
230	DPHA_B_C-gal-galG-K-plasma-EtoAc-MP-set1-L-04	52700		332		0	14400
231	DPHA_B_C-gal-galG-K-plasma-EtoAc-MP-set1-L-05			445		0	4090		52900	200	0.378072
232	DPHA_B_C-gal-galG-K-plasma-EtoAc-MP-set1-M-01			464		0	45500
233	DPHA_B_C-gal-galG-K-plasma-EtoAc-MP-set1-M-02	602000		614		0	88300
234	DPHA_B_C-gal-galG-K-plasma-EtoAc-MP-set1-M-03	591000		250		0	214000
235	DPHA_B_C-gal-galG-K-plasma-EtoAc-MP-set1-M-04	599000		709		0	76500
236	DPHA_B_C-gal-galG-K-plasma-EtoAc-MP-set1-M-05			501		0	48100		597333	5686.24	0.951938
237	DPHA_B_C-gal-galG-K-plasma-EtoAc-MP-set1-H-01			270		0	978000
238	DPHA_B_C-gal-galG-K-plasma-EtoAc-MP-set1-H-02	5720000		270		0	1900000
239	DPHA_B_C-gal-galG-K-plasma-EtoAc-MP-set1-H-03			408		0	653000
240	DPHA_B_C-gal-galG-K-plasma-EtoAc-MP-set1-H-04	5780000		613		0	853000
241	DPHA_B_C-gal-galG-K-plasma-EtoAc-MP-set1-H-05	5920000		507		0	1060000		5.80667e+06	102632	1.76749
242	DPHA_B_C-gal-galG-K-plasma-EtoAc-MP-IS-set1-01	5890		1170000		0	0.496
243	DPHA_B_C-gal-galG-K-plasma-EtoAc-MP-IS-set1-02	1370		1170000		0	0.14
244	DPHA_B_C-gal-galG-K-plasma-EtoAc-MP-IS-set1-03	1060		1160000		0	0.115
245	DPHA_B_C-gal-galG-K-plasma-EtoAc-MP-IS-set1-04	861		1170000		0	0.0992
246	DPHA_B_C-gal-galG-K-plasma-EtoAc-MP-IS-set1-05	729		1210000		0	0.0869		1176000	19493.6	1.65762
207	DPHA_B_C-gal-galG-K-plasma-EtoAc-MP-set2-L-01	59400		1390		0	4820						111.864
208	DPHA_B_C-gal-galG-K-plasma-EtoAc-MP-set2-L-02	56500		1170		0	5970						106.805
209	DPHA_B_C-gal-galG-K-plasma-EtoAc-MP-set2-L-03	61400		850		0	8310
210	DPHA_B_C-gal-galG-K-plasma-EtoAc-MP-set2-L-04	55200		689		0	10300						104.744
211	DPHA_B_C-gal-galG-K-plasma-EtoAc-MP-set2-L-05	61900		371		0	14000		57700	3269.56	5.66648			107.805	3.66394	3.39869
212	DPHA_B_C-gal-galG-K-plasma-EtoAc-MP-set2-M-01	665000		571		0	107000
213	DPHA_B_C-gal-galG-K-plasma-EtoAc-MP-set2-M-02	663000		771		0	79000						110.133
214	DPHA_B_C-gal-galG-K-plasma-EtoAc-MP-set2-M-03	663000		751		0	81200						112.183
215	DPHA_B_C-gal-galG-K-plasma-EtoAc-MP-set2-M-04	643000		599		0	98700						107.346
216	DPHA_B_C-gal-galG-K-plasma-EtoAc-MP-set2-M-05	650000		754		0	79200		656800	9757.05	1.48554			109.887	2.42793	2.20948
217	DPHA_B_C-gal-galG-K-plasma-EtoAc-MP-set2-H-01	6460000		625		0	1010000
218	DPHA_B_C-gal-galG-K-plasma-EtoAc-MP-set2-H-02	6200000		591		0	1100000						108.392
219	DPHA_B_C-gal-galG-K-plasma-EtoAc-MP-set2-H-03	5800000		812		0	716000
220	DPHA_B_C-gal-galG-K-plasma-EtoAc-MP-set2-H-04	5230000		729		0	818000						90.4844
221	DPHA_B_C-gal-galG-K-plasma-EtoAc-MP-set2-H-05	6170000		833		0	717000		5972000	476833	7.98448		104.223	101.033	9.3701	9.27429
222	DPHA_B_C-gal-galG-K-plasma-EtoAc-MP-IS-set2-01	25000		1030000		0	2.26						88.0342
223	DPHA_B_C-gal-galG-K-plasma-EtoAc-MP-IS-set2-02	10300		1030000		0	0.946						88.0342
224	DPHA_B_C-gal-galG-K-plasma-EtoAc-MP-IS-set2-03	13600		1020000		0	1.27						87.931
225	DPHA_B_C-gal-galG-K-plasma-EtoAc-MP-IS-set2-04	9090		1020000		0	0.85						87.1795
226	DPHA_B_C-gal-galG-K-plasma-EtoAc-MP-IS-set2-05	14900		1060000		0	1.33		1032000	16431.7	1.59222		87.6033	87.7564	0.367796	0.41911
108	DPHA_B_C-gal-galG-K-plasma-EtoAc-MP-precision-day1-L-01	53900											90.7407
109	DPHA_B_C-gal-galG-K-plasma-EtoAc-MP-precision-day1-L-02	50300											89.0265
110	DPHA_B_C-gal-galG-K-plasma-EtoAc-MP-precision-day1-L-03	51500											83.8762
111	DPHA_B_C-gal-galG-K-plasma-EtoAc-MP-precision-day1-L-04	61800											111.957
112	DPHA_B_C-gal-galG-K-plasma-EtoAc-MP-precision-day1-L-05	54600											88.2068	92.7614	11.0247	11.885
114	DPHA_B_C-gal-galG-K-plasma-EtoAc-MP-precision-day1-M-01	711000											106.917
115	DPHA_B_C-gal-galG-K-plasma-EtoAc-MP-precision-day1-M-02	597000											90.0452
116	DPHA_B_C-gal-galG-K-plasma-EtoAc-MP-precision-day1-M-03	597000											90.0452
117	DPHA_B_C-gal-galG-K-plasma-EtoAc-MP-precision-day1-M-04	568000											88.3359
118	DPHA_B_C-gal-galG-K-plasma-EtoAc-MP-precision-day1-M-05	550000											84.6154	91.9918	8.63315	9.3847
120	DPHA_B_C-gal-galG-K-plasma-EtoAc-MP-precision-day1-H-01	6780000											104.954
121	DPHA_B_C-gal-galG-K-plasma-EtoAc-MP-precision-day1-H-02	6540000											105.484
122	DPHA_B_C-gal-galG-K-plasma-EtoAc-MP-precision-day1-H-03	6210000											107.069
123	DPHA_B_C-gal-galG-K-plasma-EtoAc-MP-precision-day1-H-04	5370000											102.677
124	DPHA_B_C-gal-galG-K-plasma-EtoAc-MP-precision-day1-H-05	5470000											88.6548	101.768	7.4973	7.36708
	DPHA_B_C-gal-galG-K-plasma-EtoAc-MP-IS-set2-01												0
	DPHA_B_C-gal-galG-K-plasma-EtoAc-MP-IS-set2-02												0
	DPHA_B_C-gal-galG-K-plasma-EtoAc-MP-IS-set2-03												0
	DPHA_B_C-gal-galG-K-plasma-EtoAc-MP-IS-set2-04												0
	DPHA_B_C-gal-galG-K-plasma-EtoAc-MP-IS-set2-05												0	0	0
