# Supplementary material for: Simultaneous determination of two galangin metabolites from Alpinia Officinarum Hance in rat plasma by UF LC-MS/MS and its application in pharmacokinetics study
Source: PeerJ. 2021 Mar 16;9:e11041. doi: 10.7717/peerj.11041 (PMC7977375; doi:10.7717/peerj.11041)
Supplement: Supplemental Information 2 — The measured values of concentration-time and the calculated pharmacokinetic parameters of GG-1. [file peerj-09-11041-s002.xlsx]

## Sheet: Data
non-compartmental model analysis
DAS 3.3.0	Analysis date：2020/6/9
Calculating Settings										Calculating Settings
Settings	Options	Settings	Options							Settings	Options	Settings	Options
Name	g-3-g	Dose	300							Name	g-7-g	Dose	300
Regimen	Non-intravenous administration	Dose unit	mg/kg							Regimen	Non-intravenous administration	Dose unit	mg/kg
Frequency	Single	Conc. unit	ug/L							Frequency	Single	Conc. unit	ug/L
Subjects	Rats	Time unit	h							Subjects	Rats	Time unit	h
Minimum detection limit	Two	Interval of medication	NA							Minimum detection limit	Two	Interval of medication	NA
Nonatrioventricular model statistical moment parameters										Nonatrioventricular model statistical moment parameters
Parameters	Unit	No1	No2	No3	No4	No5	Mean	SD	RSD/%	Parameters	Unit	No1	No2	No3	No4	No5	Mean	SD	RSD/%			GG-1	GG-2
AUC(0-t)	ug/L*h	1869.45	2303.47	1999.2	2218.22	3563.95	2390.86	678.023	28.4	AUC(0-t)	ug/L*h	4030.86	4396.28	3681.42	4677.64	5988.27	4554.9	884.924	19.4	AUC(0-t)	ug/L*h	2390.86±678.02	4554.90±884.94
AUC(0-∞)	ug/L*h	1874.09	2303.47	2111.2	2313.95	3563.95	2433.33	656.876	27	AUC(0-∞)	ug/L*h	4157.51	4396.28	4082.08	5090.89	5988.27	4743.01	801.806	16.9	AUC(0-∞)	ug/L*h	2433.333±	4743.01
R_AUC(t/∞)	%	99.8	100	94.7	95.9	100	98.08	2.574	2.6	R_AUC(t/∞)	%	97	100	90.2	91.9	100	95.82	4.563	4.8	R_AUC(t/∞)	%	98.08±	95.82
AUMC(0-t)	h*h*ug/L	882.107	4475.47	2415.47	1560.78	8603.64	3587.49	3112.5	86.8	AUMC(0-t)	h*h*ug/L	2813.39	9603.89	5466.74	4723.18	14512.1	7423.86	4673.76	63	AUMC(0-t)	h*h*ug/L	3587.493±	7423.86
AUMC(0-∞)	h*h*ug/L	927.907	4475.47	3688.72	2753.72	8603.64	4089.89	2848.99	69.7	AUMC(0-∞)	h*h*ug/L	4422.24	9603.89	10421	10185.6	14512.1	9828.97	3594.89	36.6	AUMC(0-∞)	h*h*ug/L	4089.889±	9828.97
MRT(0-t)	h	0.472	1.943	1.208	0.704	2.414	1.348	0.82	60.8	MRT(0-t)	h	0.698	2.185	1.485	1.01	2.423	1.56	0.739	47.4	MRT(0-t)	h	1.35±0.82	1.56±0.74
MRT(0-∞)	h	0.495	1.943	1.747	1.19	2.414	1.558	0.739	47.4	MRT(0-∞)	h	1.064	2.185	2.553	2.001	2.423	2.045	0.588	28.8	MRT(0-∞)	h	1.558±	2.045
VRT(0-t)	h^2	1.043	7.841	3.607	2.023	9.135	4.73	3.58	75.7	VRT(0-t)	h^2	1.636	8.101	4.381	3.199	9.432	5.35	3.301	61.7	VRT(0-t)	h^2	4.73	5.35
VRT(0-∞)	h^2	1.267	7.841	9.204	8.245	9.135	7.138	3.333	46.7	VRT(0-∞)	h^2	6.517	8.101	16.301	16.266	9.432	11.323	4.644	41	VRT(0-∞)	h^2	7.138	11.323
λz	1/h	0.539	0	0.297	0.224	0	0.212	0.226	106.6	λz	1/h	0.213	0	0.229	0.192	0	0.127	0.116	91.3	λz	1/h	0.212	0.127
λz back end point		234		123	123		--	--	--	λz back end point		123		123	123		--	--	--	λz back end point		--	--
C_last	ug/L	2.504	1	33.243	21.462	1	11.842	14.772	124.7	C_last	ug/L	26.924	1	91.78	79.199	1	39.981	43.101	107.8	C_last	ug/L	11.842	39.981
t1/2z	h	1.286		2.335	3.091	2.237	2.237	0.74	33.1	t1/2z	h	3.26		3.025	3.616	3.3	3.3	0.243	7.4	t1/2z	h	2.24±0.74	3.3±0.24
Tmax	h	0.0833	0.25	0.25	0.25	0.25	0.217	0.075	34.6	Tmax	h	0.0833	0.25	0.25	0.25	0.25	0.217	0.075	34.6	Tmax	h	0.25±0.08	0.25±0.08
Vz/F	L/kg	297.122		478.722	578.325		451.39	142.58	31.6	Vz/F	L/kg	339.411		320.824	307.486		322.574	16.034	5	Vz/F	L/kg	451.39	322.574
CLz/F	L/h/kg	160.077	130.239	142.1	129.648	84.176	129.248	28.055	21.7	CLz/F	L/h/kg	72.159	68.239	73.492	58.929	50.098	64.583	9.898	15.3	CLz/F	L/h/kg	129.248	64.583
Cmax	ug/L	5550	5718	4620	7140	7320	6069.6	1140.64	18.8	Cmax	ug/L	9600	10140	7380	13440	12420	10596	2395.72	22.6	Cmax	ug/L	6069.60±1140.64	10596±2395.72
Concentration-time measured data
Time(h)	No1	No2	No3	No4	No5	Mean	SD	RSD/%
0.0833	5550	3378	2520	3126	5670	4048.8	1459.51	36
0.25	4278	5718	4620	7140	7320	5815.2	1398.25	24
0.5	277	25	485	14	19.8	164.16	211.202	128.7
1	19.8	6.96	171	23.6	7.61	45.794	70.376	153.7
2	67.3	6.85	11.4	110	15.3	42.17	45.135	107
4	19.2	61.5	139	34.1	108	72.36	50.296	69.5
6	7.8	179	37		345	142.2	154.502	108.7
8	10.7	184	42.4	24.8	388	129.98	160.042	123.1
