# Supplementary material for: Simultaneous determination of two galangin metabolites from Alpinia Officinarum Hance in rat plasma by UF LC-MS/MS and its application in pharmacokinetics study
Source: PeerJ. 2021 Mar 16;9:e11041. doi: 10.7717/peerj.11041 (PMC7977375; doi:10.7717/peerj.11041)
Supplement: Supplemental Information 3 — The measured values of concentration-time and the calculated pharmacokinetic parameters of GG-2. [file peerj-09-11041-s003.xlsx]

## Sheet: Data
non-compartmental model analysis
DAS 3.3.0	Analysis date：2020/6/9
Calculating Settings
Settings	Options	Settings	Options
Name	g-7-g	Dose	300
Regimen	Non-intravenous administration	Dose unit	mg/kg
Frequency	Single	Conc. unit	ug/L
Subjects	Rats	Time unit	h
Minimum detection limit	Two	Interval of medication	NA
Nonatrioventricular model statistical moment parameters
Parameters	Unit	No1	No2	No3	No4	No5	Mean	SD	RSD/%
AUC(0-t)	ug/L*h	4030.86	4396.28	3681.42	4677.64	5988.27	4554.9	884.924	19.4
AUC(0-∞)	ug/L*h	4157.51	4396.28	4082.08	5090.89	5988.27	4743.01	801.806	16.9
R_AUC(t/∞)	%	97	100	90.2	91.9	100	95.82	4.563	4.8
AUMC(0-t)	h*h*ug/L	2813.39	9603.89	5466.74	4723.18	14512.1	7423.86	4673.76	63
AUMC(0-∞)	h*h*ug/L	4422.24	9603.89	10421	10185.6	14512.1	9828.97	3594.89	36.6
MRT(0-t)	h	0.698	2.185	1.485	1.01	2.423	1.56	0.739	47.4
MRT(0-∞)	h	1.064	2.185	2.553	2.001	2.423	2.045	0.588	28.8
VRT(0-t)	h^2	1.636	8.101	4.381	3.199	9.432	5.35	3.301	61.7
VRT(0-∞)	h^2	6.517	8.101	16.301	16.266	9.432	11.323	4.644	41
λz	1/h	0.213	0	0.229	0.192	0	0.127	0.116	91.3
λz back end point		123		123	123		--	--	--
C_last	ug/L	26.924	1	91.78	79.199	1	39.981	43.101	107.8
t1/2z	h	3.26		3.025	3.616	3.3	3.3	0.243	7.4
Tmax	h	0.0833	0.25	0.25	0.25	0.25	0.217	0.075	34.6
Vz/F	L/kg	339.411		320.824	307.486		322.574	16.034	5
CLz/F	L/h/kg	72.159	68.239	73.492	58.929	50.098	64.583	9.898	15.3
Cmax	ug/L	9600	10140	7380	13440	12420	10596	2395.72	22.6
Concentration-time measured data
Time(h)	No1	No2	No3	No4	No5	Mean	SD	RSD/%
0.0833	9600	5790	3624	5334	9660	6801.6	2705.36	39.8
0.25	8280	10140	7380	13440	12420	10332	2597.18	25.1
0.5	1090	113	1020	91.1	50.3	472.88	532.452	112.6
1	71.7	6.31	511	138	4.34	146.27	211.181	144.4
2	272	7.17	14.7	423	9.3	145.234	192.225	132.4
4	64.6	184	310	77.5	176	162.42	99.008	61
6	39.2	394	79.5		531	260.925	239.949	92
8	27.6	346	124	103	743	268.72	290.456	108.1
